# Supplementary material
Source: PubMed Central journal article supplement (PMC3653137)

## SUPPORTING INFORMATION

### Efficient Delivery of Cell Impermeable Phosphopeptides by a Cyclic Peptide Amphiphile Containing Tryptophan and Arginine

*Amir Nasrolahi Shirazi,<sup>†</sup> Rakesh Kumar Tiwari,<sup>†</sup> Donghoon Oh,<sup>†</sup> Antara Banerjee,<sup>‡</sup> Arpita  
Yadav,<sup>‡</sup> and Keykavous Parang<sup>\*†</sup>*

kparang@uri.edu

<sup>†</sup>Department of Biomedical and Pharmaceutical Sciences, College of Pharmacy, University of  
Rhode Island, Kingston, RI 02881, United States

<sup>‡</sup>Department of Chemistry, University Institute of Engineering and Technology, Chhatrapati  
Shahuji Maharaj University, Kanpur 208024, India

\*Corresponding author:

K. Parang: 7 Greenhouse Road, Department of Biomedical and Pharmaceutical Sciences,  
College of Pharmacy, University of Rhode Island, Kingston, Rhode Island, 02881, United States;  
Tel.: +1-401-874-4471; Fax: +1-401-874-5787; E-mail address: kparang@uri.edu

| <b>Table of Contents:</b>             | <b>Page</b> |
|---------------------------------------|-------------|
| 1. Analytical HPLC                    | 3           |
| 2. High-Resolution MALDI TOF/TOF Data | 7           |

## 1. Analytical HPLC

The analytical HPLC was performed on a Hitachi analytical HPLC system using a C18 Shimadzu Premier 3  $\mu\text{m}$  column (150 cm  $\times$  4.6 mm) using a gradient solvent system, and a flow rate of 1 mL/min with detection at 214 nm. Analytical HPLC shows multiple charged peptides.

| Time (min) | Water-A (%) | Acetonitrile-B (%) | Flow Rate (mL/min) |
|------------|-------------|--------------------|--------------------|
| 0.0        | 100.0       | 0.0                | 1.0                |
| 10.0       | 0.0         | 100.0              | 1.0                |
| 14.0       | 100.0       | 0.0                | 1.0                |
| 16.0       | 100.0       | 0.0                | 1.0                |

### F'-pYVNVQN-NH<sub>2</sub>

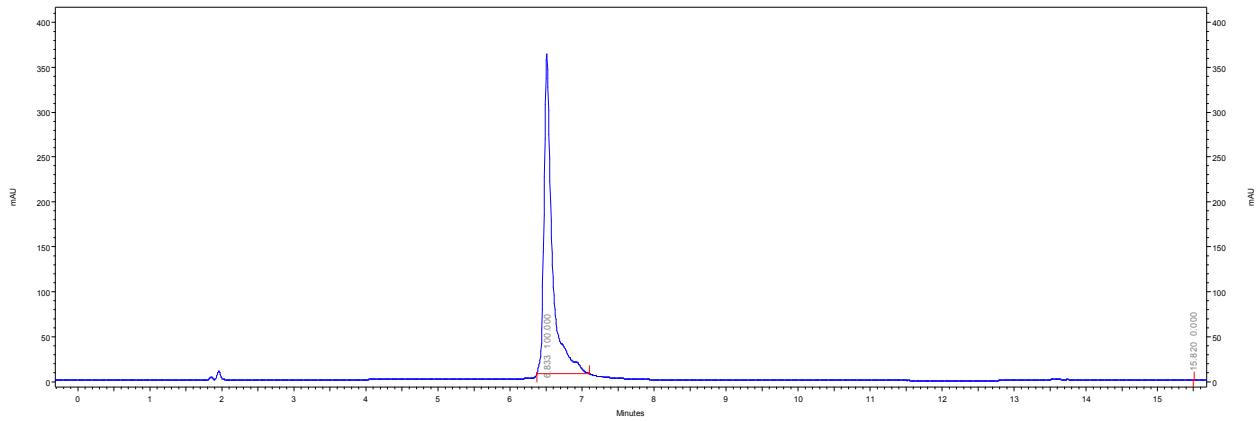

## F'-AEEIYGEFEAKKKK

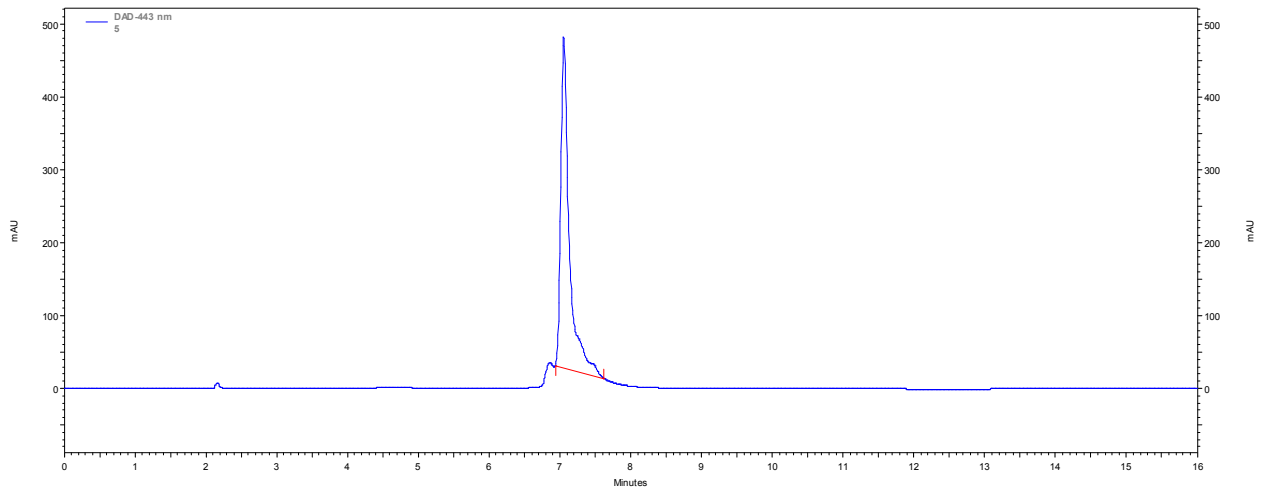

## F'-NEpYTARQ

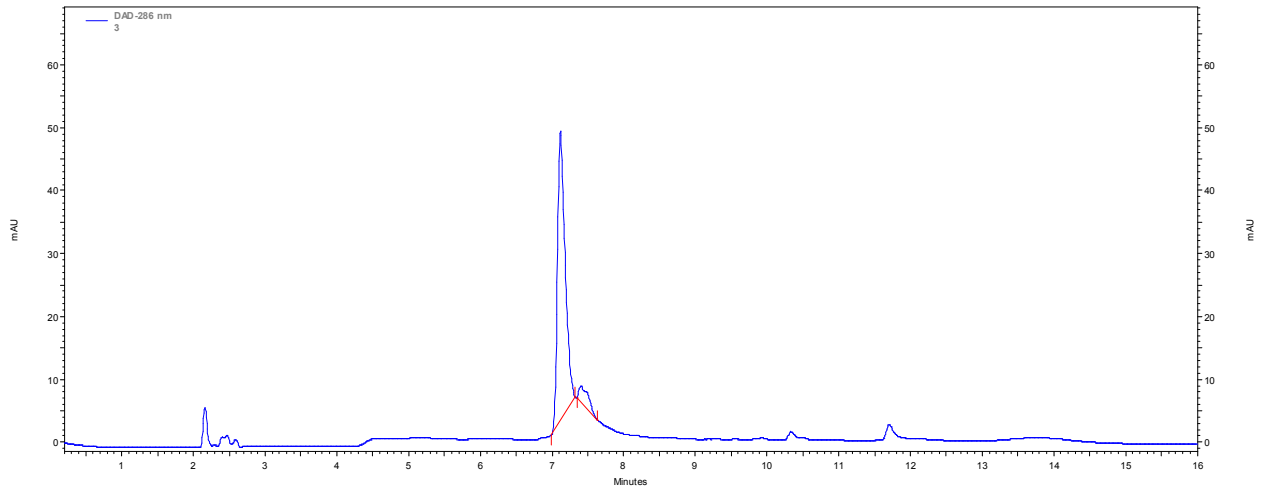

## F'-GpYLPQTV

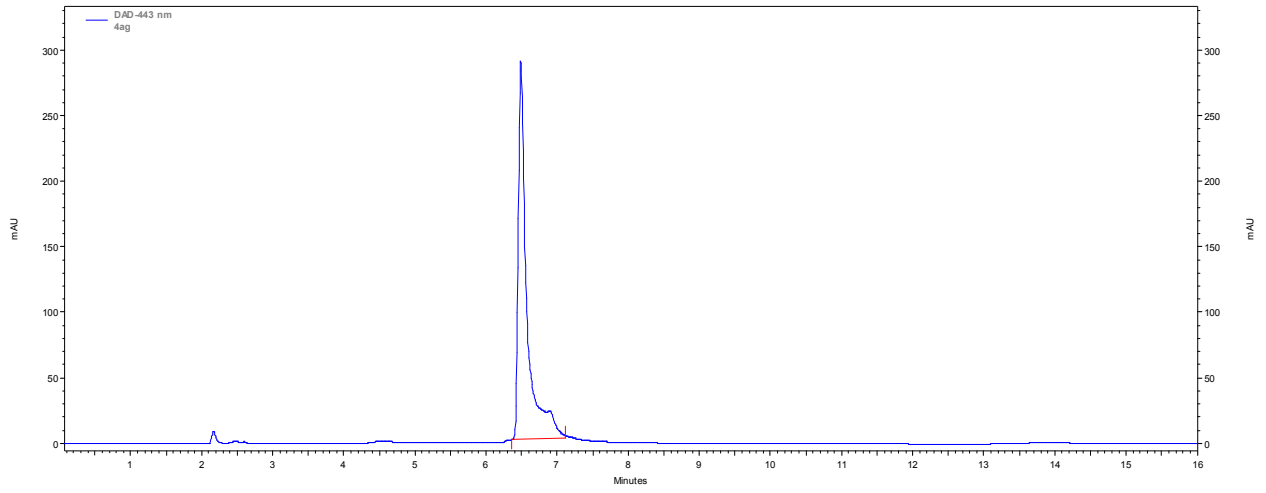

## F'-PEpYLGLD

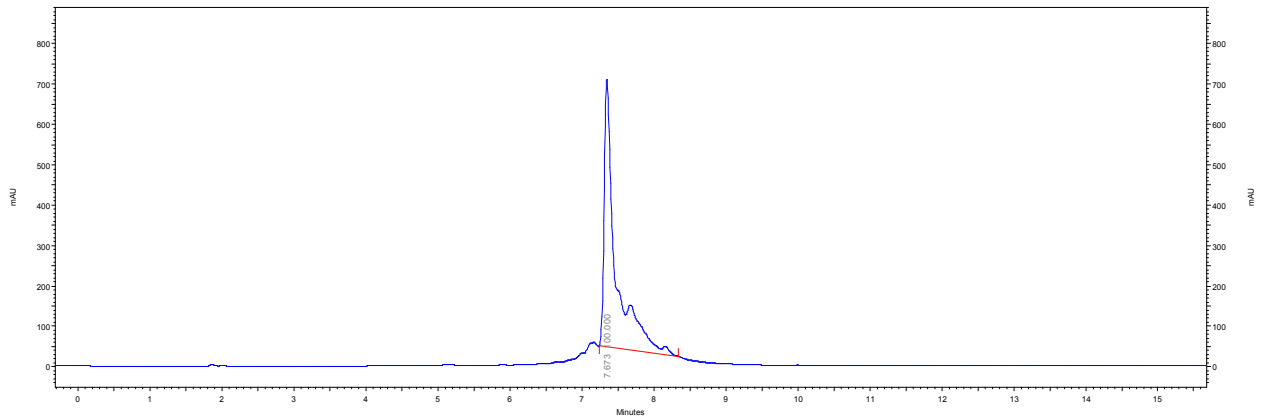

# F'-PEpYLGLD

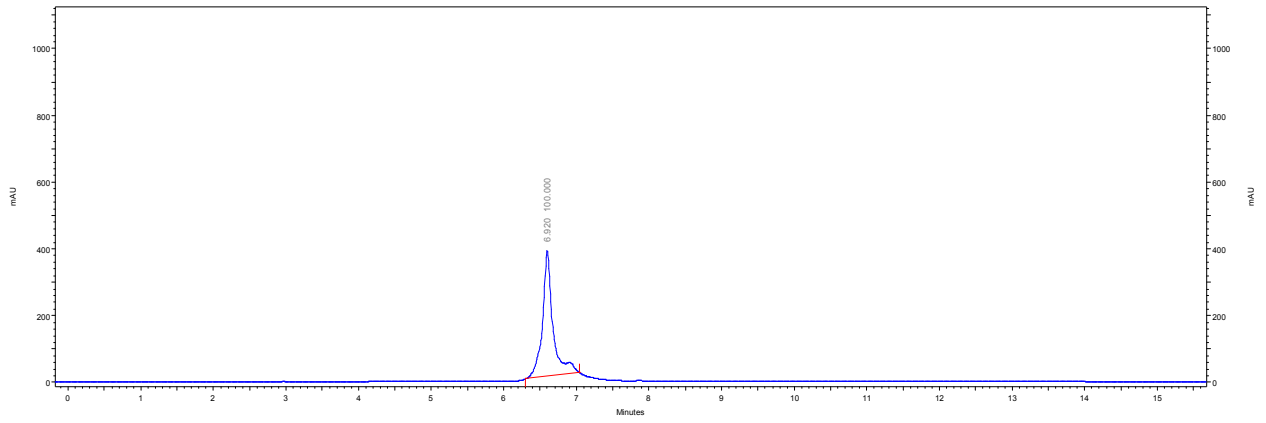

## 2. High-Resolution MALDI TOF/TOF Data

Data: Rakeshphosphopeptides\Ac-PE0001.G7[c] 5 Mar 2013 11:50 Cal: low mass peptide 5 Dec 2012 12:34  
Shimadzu Biotech Axima Performance 2.9.2.20100726: Mode Reflectron, Power: 50, Blanked, P.Ext. @ 2900 (bin 98)

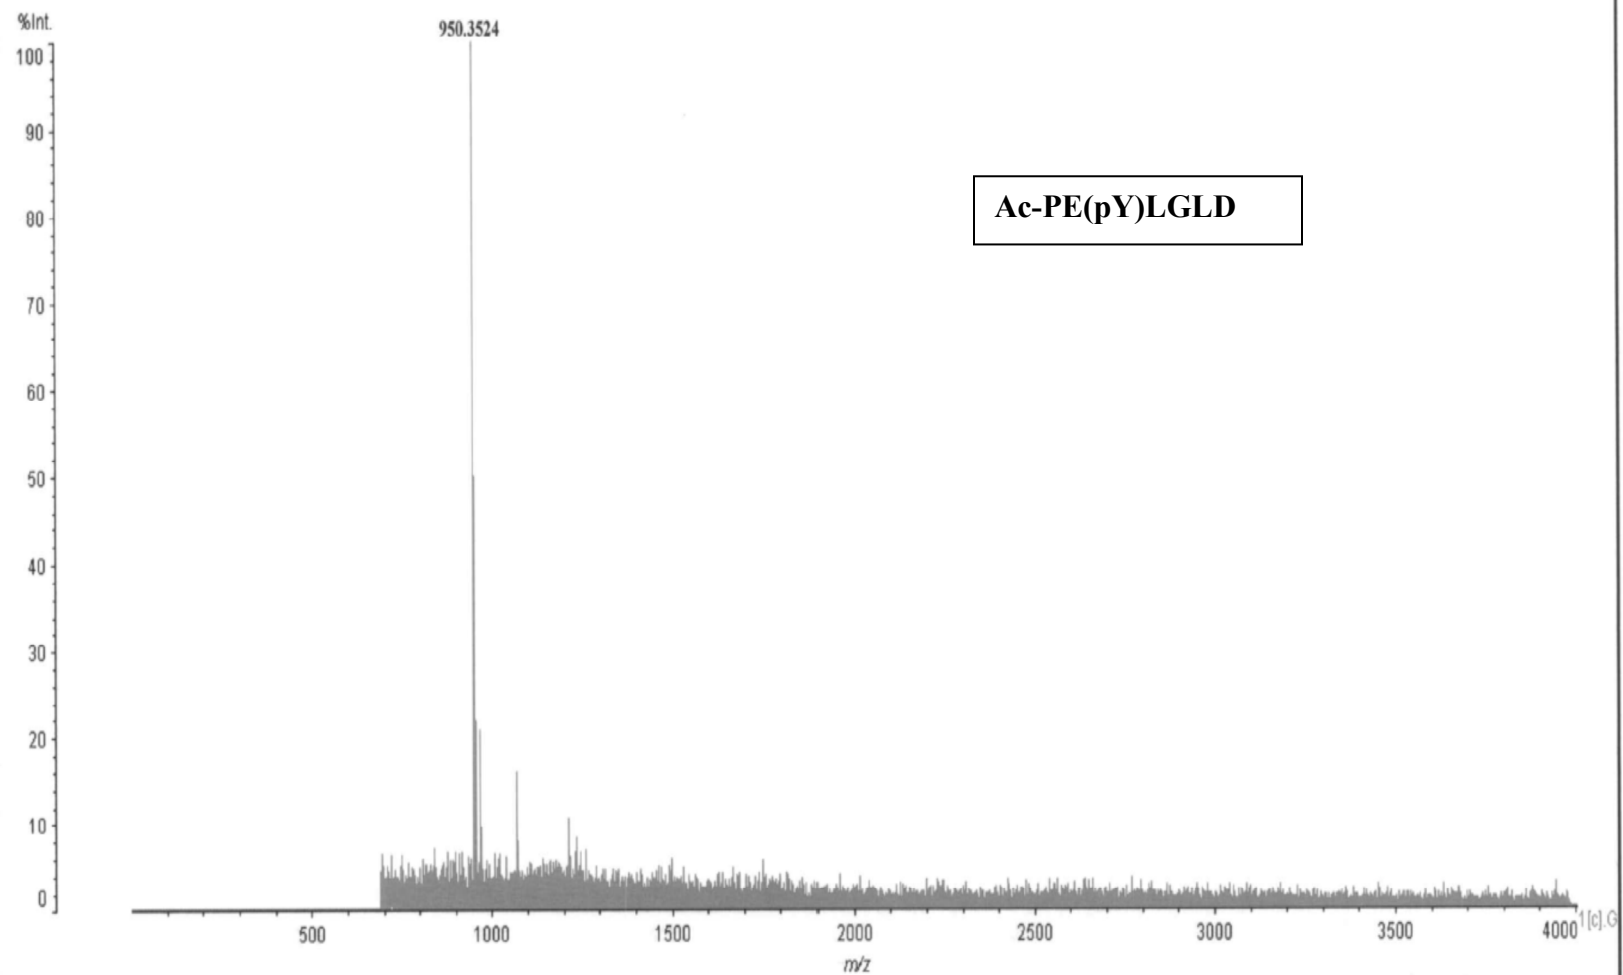



Data: Rakesh\phosphopeptides\F-PEpYLGLD-10003.G10[c] 5 Mar 2013 15:08 Cal: low mass peptide 5 Dec 2012 12:34  
Shimadzu Biotech Axima Performance 2.9.2.20100726: Mode Reflectron, Power: 30, Blanked, P.Ext. @ 2300 (bin 87)

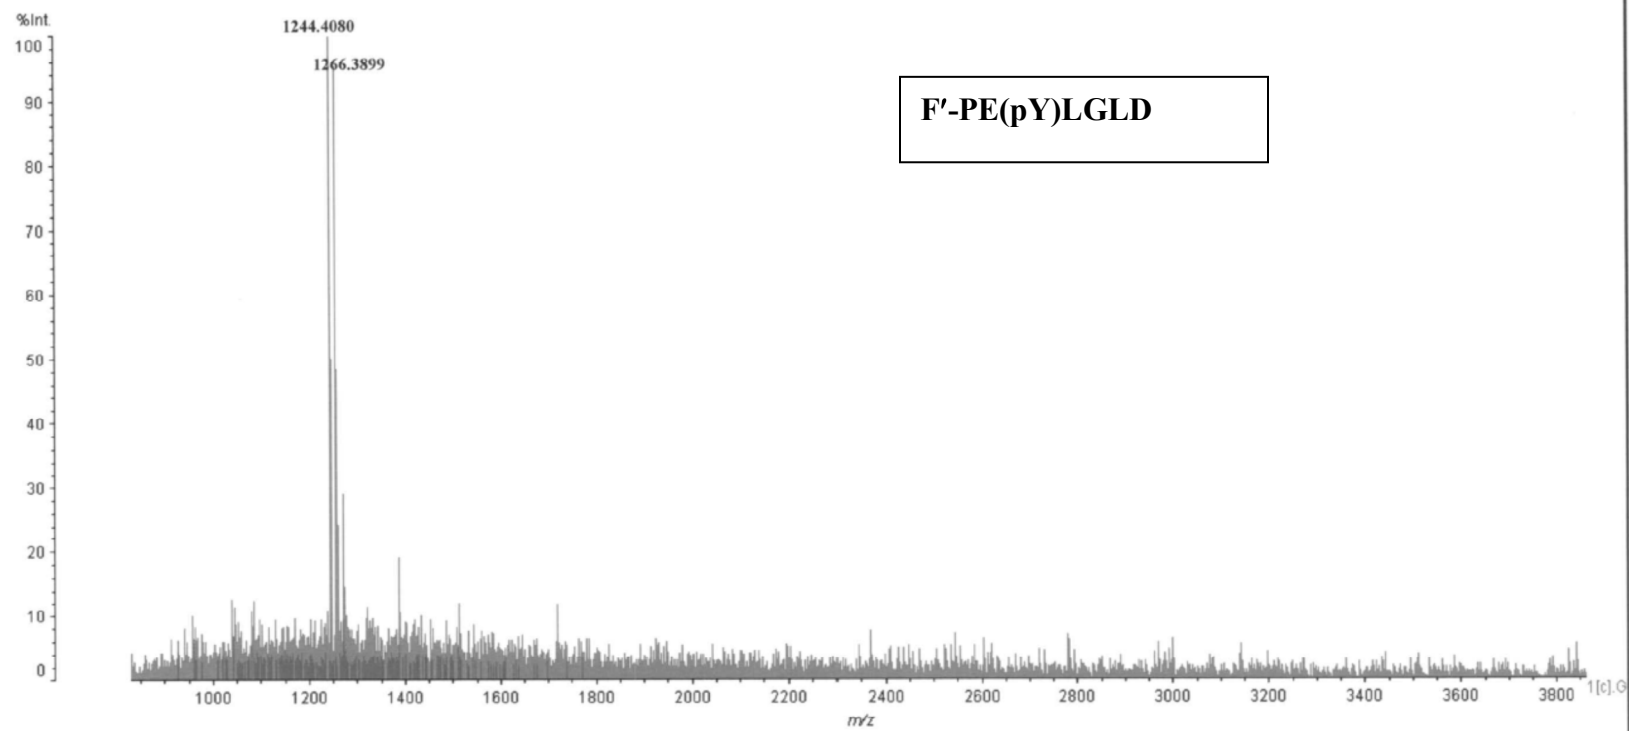

Data: Rakeshphosphopeptidesf-gpYlptq0001.G9[c] 5 Mar 2013 12:04 Cal: low mass peptide 5 Dec 2012 12:34  
Shimadzu Biotech Axima Performance 2.9.2.20100726: Mode Reflectron, Power: 50, Blanked, P.Ext. @ 2500 (bin 91)

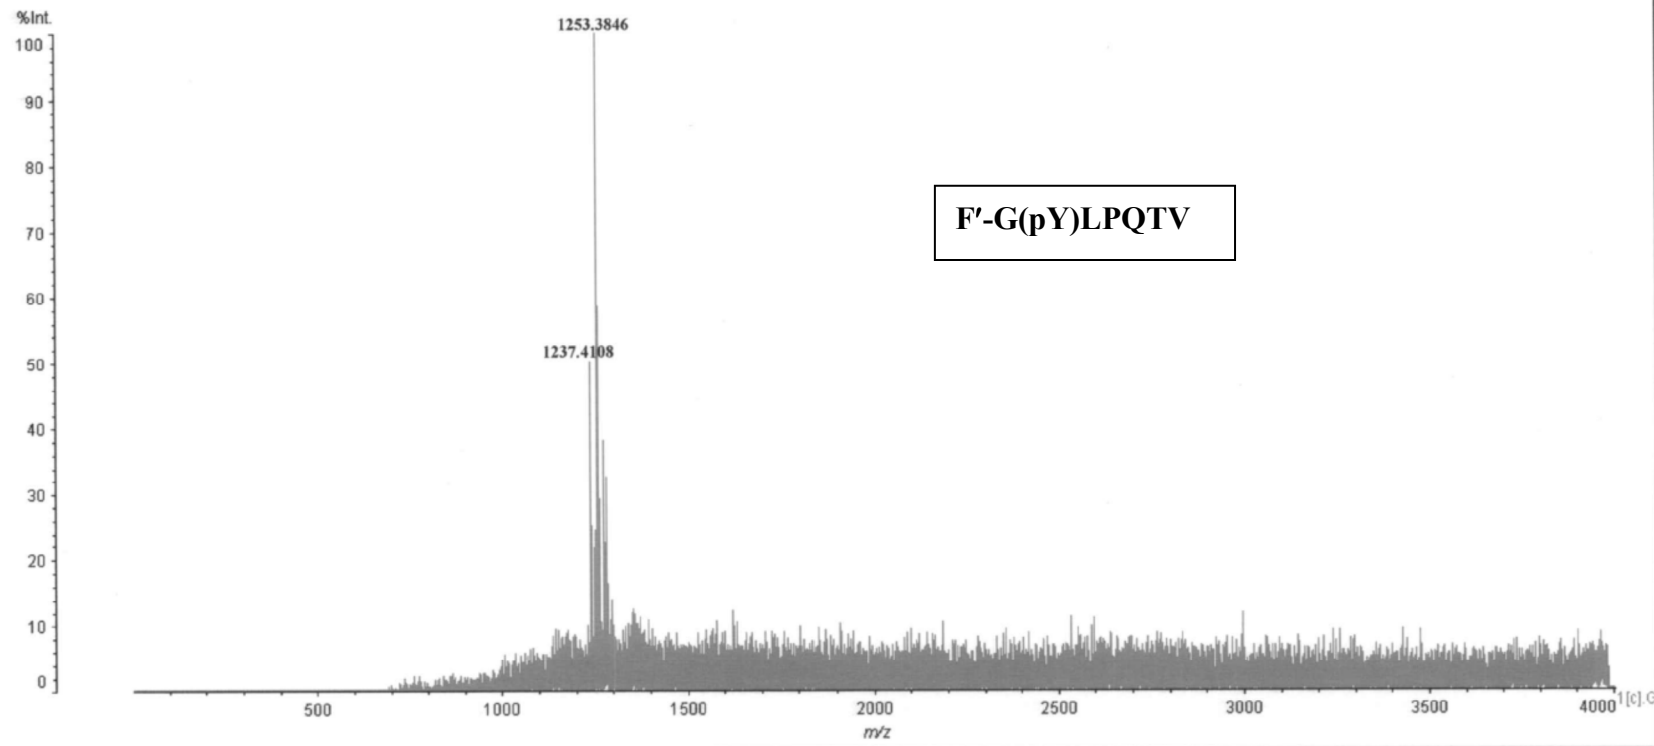

Data: rakeshphosphopeptides\0030006.G11[c] 4 Mar 2013 18:27 Cal: low mass peptide1 4 Mar 2013 16:55  
Shimadzu Biotech Axima Performance 2.9.2.20100726: Mode Reflectron, Power: 41, Blanked, P.Ext. @ 2600 (bin 93)

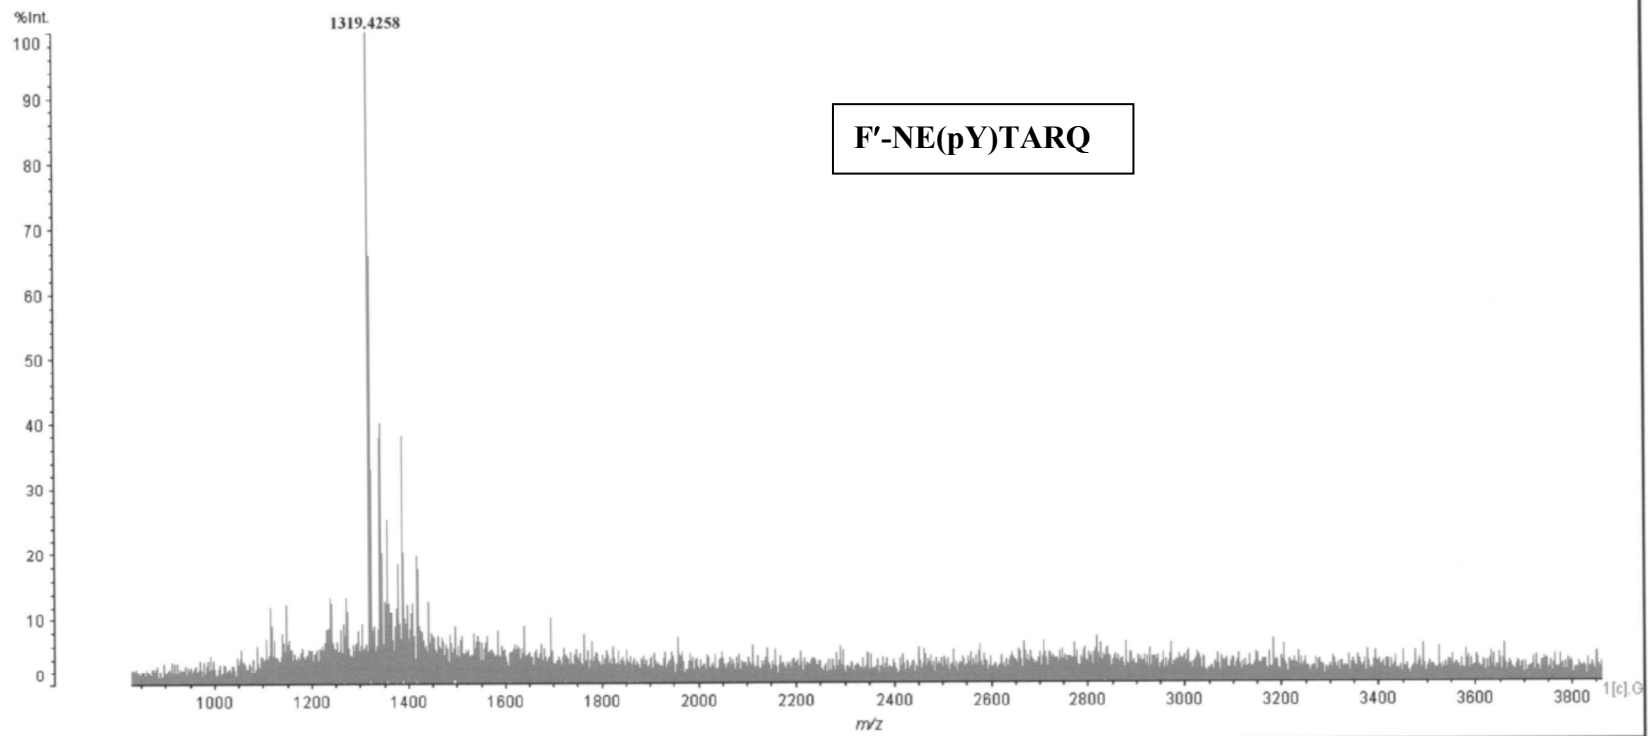

Data: rakesh\phosphopeptides\0020010.012[c] 4 Mar 2013 18:16 Cal: low mass peptide 5 Dec 2012 12:34  
Shimadzu Biotech Axima Performance 2.9.2.20100726: Mode Reflectron, Power: 36, Blanked, P.Ext. @ 3450 (bin 107)

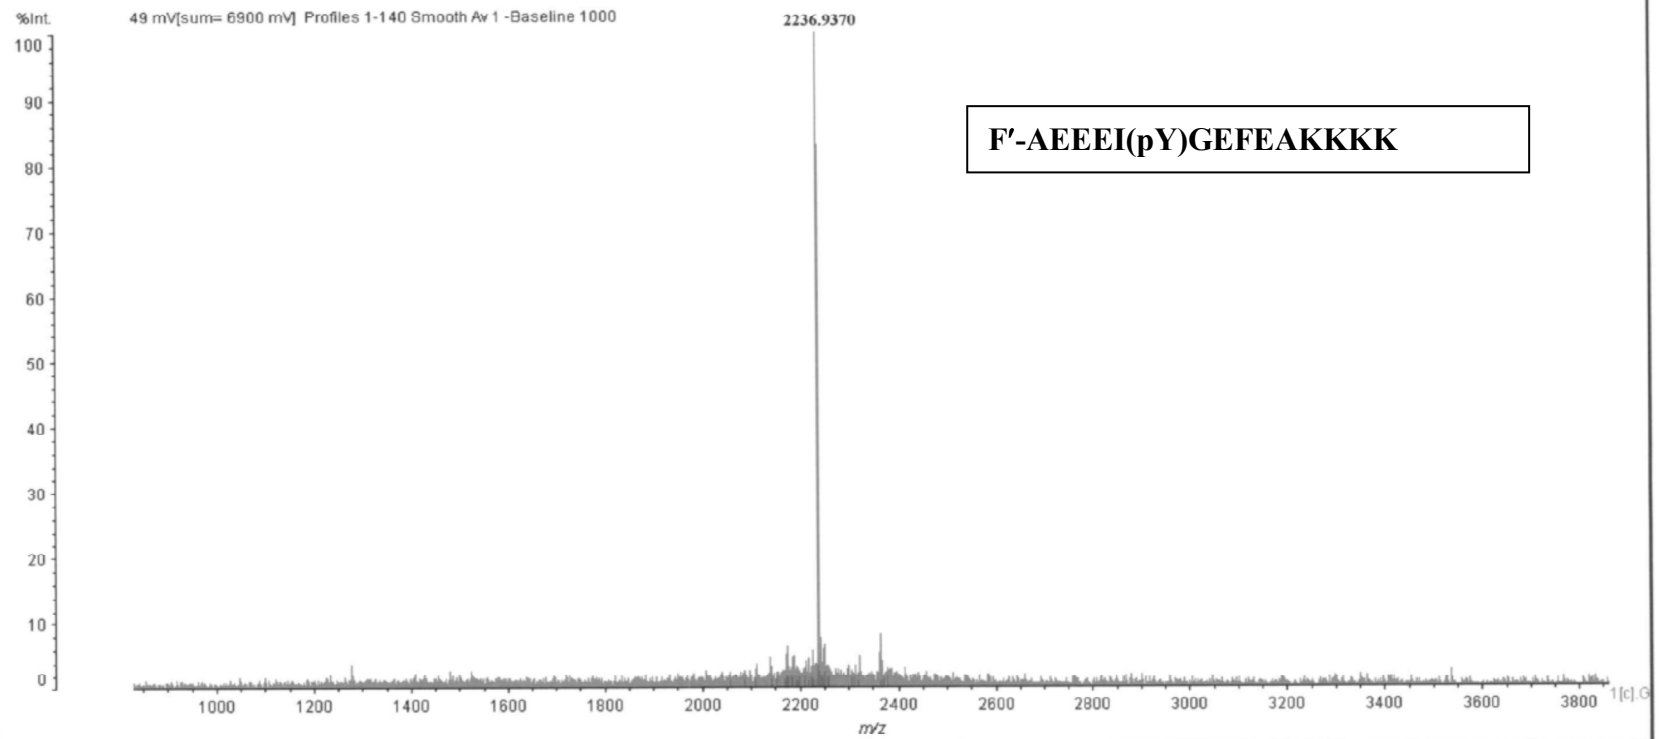

Data: rakesh\phosphopeptides\0010003.G13[c] 4 Mar 2013 18:00 Cal. low mass peptide 5 Dec 2012 12:34  
Shimadzu Biotech Axima Performance 2.9.2.20100726: Mode Reflectron, Power: 36, Blanked, P.Ext. @ 2850 (bin 97)

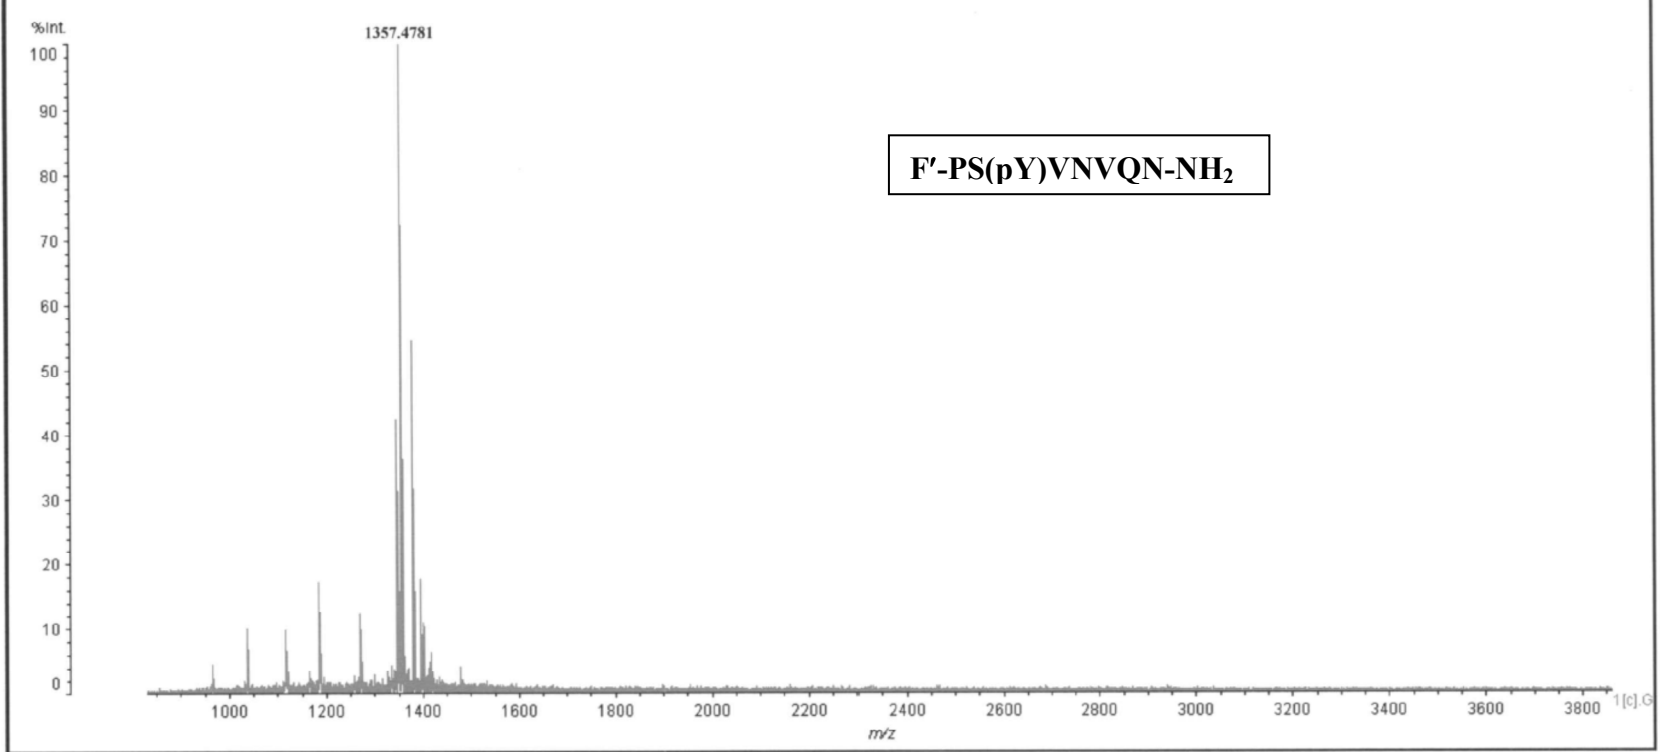

Data: Rakesh\phosphopeptides\flu-GpYEE-10010.G14[c] 4 Mar 2013 17:47 Cal: low mass peptide 5 Dec 2012 12:34  
Shimadzu Biotech Axima Performance 2.9.2.20100726: Mode Reflectron, Power: 36, Blanked, P.Ext. @ 2700 (bin 95)

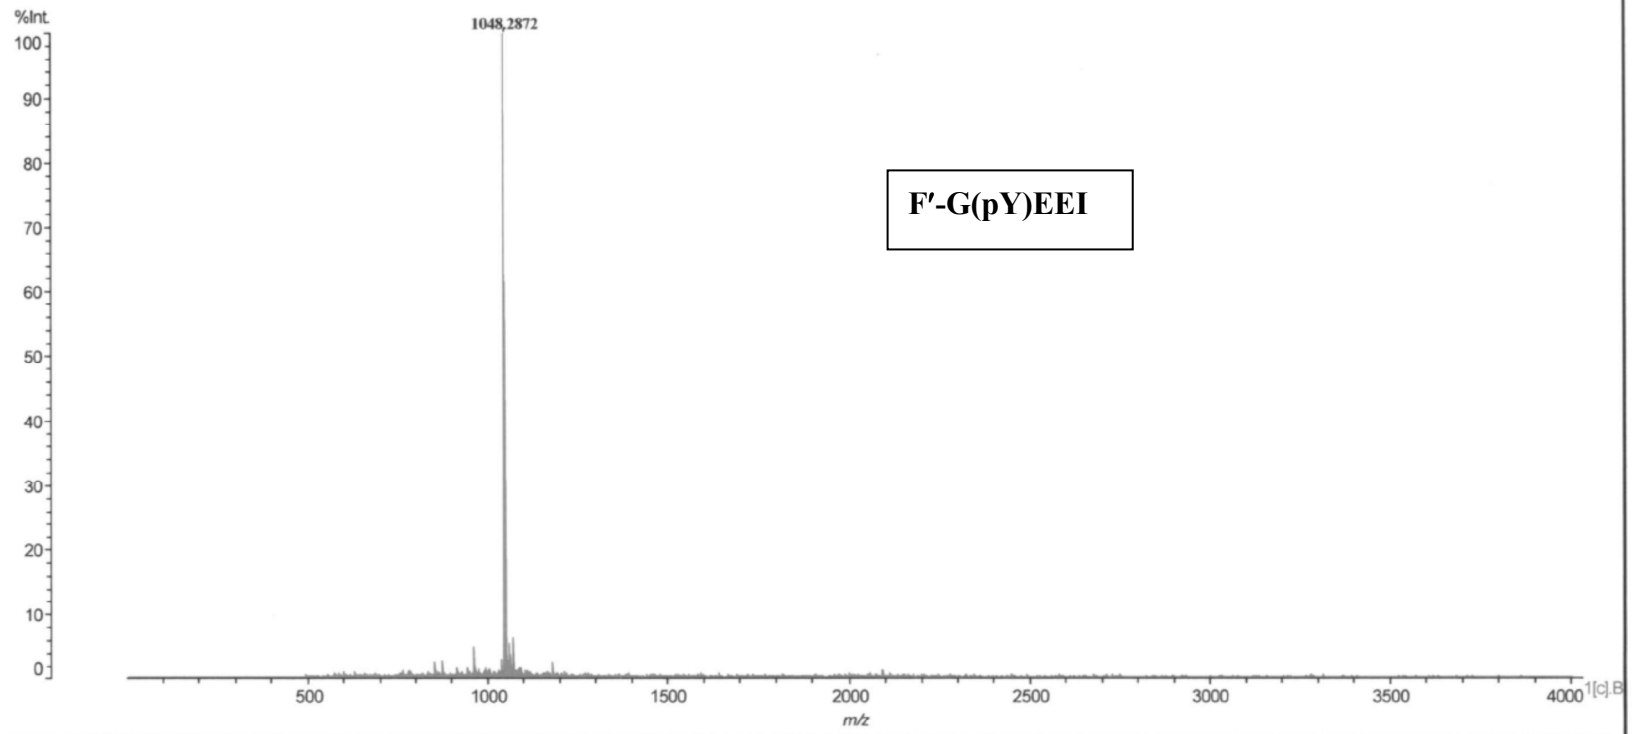

Supplement: NIHMS463035-supplement-1_si_001.pdf [file NIHMS463035-supplement-1_si_001.pdf]
